# Supplementary material for: In Vitro Evaluation of Rigosertib Antitumoral and Radiosensitizing Effects against Human Cholangiocarcinoma Cells
Source: MDPI journal article supplement (doi:10.3390/ijms22158230), 2021-07-30
Supplement: s1 [file s1]

# *In vitro* evaluation of Rigosertib antitumoral and radiosensitizing effects against human cholangiocarcinoma cells

Alessio Malacrida, Roberta Rigolio, Luigi Celio, Silvia Damian, Guido Cavaletti, Vincenzo Mazzaferro, and Mariarosaria Miloso

**Supplementary Table S1.** Percentage of counted EGI-1 death cells after Gem and 5-FU treatments in Trypan blue assay (\*  $p < 0.05$ , \*\*  $p < 0.01$  vs CTRL).

| [ Gem ] | 24h           | 48h           | 72h            |
|---------|---------------|---------------|----------------|
| CTRL    | 5.3 ± 1.2     | 7.5 ± 1.8     | 11.9 ± 1.2     |
| 3nM     | 5.4 ± 1.1     | 8.2 ± 1.7     | 11.9 ± 1.8     |
| 30nM    | 5.0 ± 1.0     | 10.8 ± 3.0    | 12.9 ± 1.8     |
| 300nM   | 5.8 ± 1.2     | 12.8 ± 3.3    | 11.7 ± 1.7     |
| 3μM     | 6.4 ± 1.0     | 19.5 ± 2.4 ** | 23.4 ± 2.4 **  |
| 30μM    | 7.1 ± 1.1     | 29.9 ± 4.5 ** | 48.0 ± 9.2 **  |
| 300μM   | 11.8 ± 2.1 ** | 50.9 ± 5.9 ** | 70.8 ± 13.2 ** |

| [ 5-FU ] | 24h           | 48h           | 72h             |
|----------|---------------|---------------|-----------------|
| 7nM      | 6.2 ± 1.2     | 9.5 ± 1.5     | 14.9 ± 2.1      |
| 70nM     | 7.8 ± 1.0     | 11.5 ± 2.1    | 20.8 ± 3.1      |
| 700nM    | 9.8 ± 2.6     | 15.7 ± 3.3    | 21.2 ± 2.9      |
| 7μM      | 12.5 ± 2.7 *  | 24.2 ± 5.8 ** | 48.8 ± 6.7 **   |
| 70μM     | 16.7 ± 3.1 ** | 27.0 ± 4.8 ** | 45.4 ± 18.7 **  |
| 700μM    | 21.8 ± 4.4 ** | 29.6 ± 6.2 ** | 48.12 ± 10.6 ** |

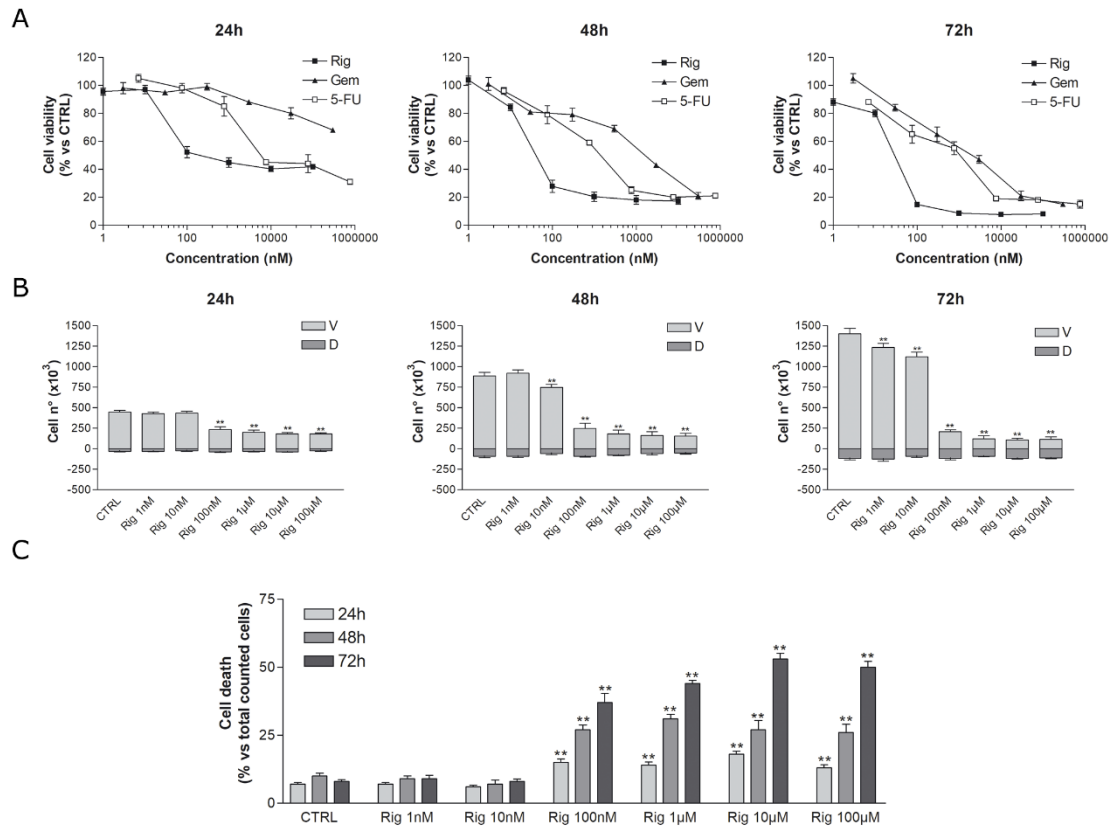

**Supplementary Figure S1. . Trypan blue vital count of TFK-1 cells treated with Rig, Gem or 5-FU. (A)** Percentage of viable cells after treatment with different concentrations of Rig (1nM – 100μM), Gem (3nM – 300μM) and 5-FU (7nM – 700μM). **(B)** Number of viable (V) and dead (D) cells treated with increasing concentrations of Rig (1nM – 100μM) for 24, 48 and 72h. **(C)** Percentage of counted TFK-1 death cells after Rig treatment. The percentage is calculated on the total number of counted cells. Data are presented as the mean ± SD of at least three independent experiments (\*\*  $p < 0.01$  vs CTRL).

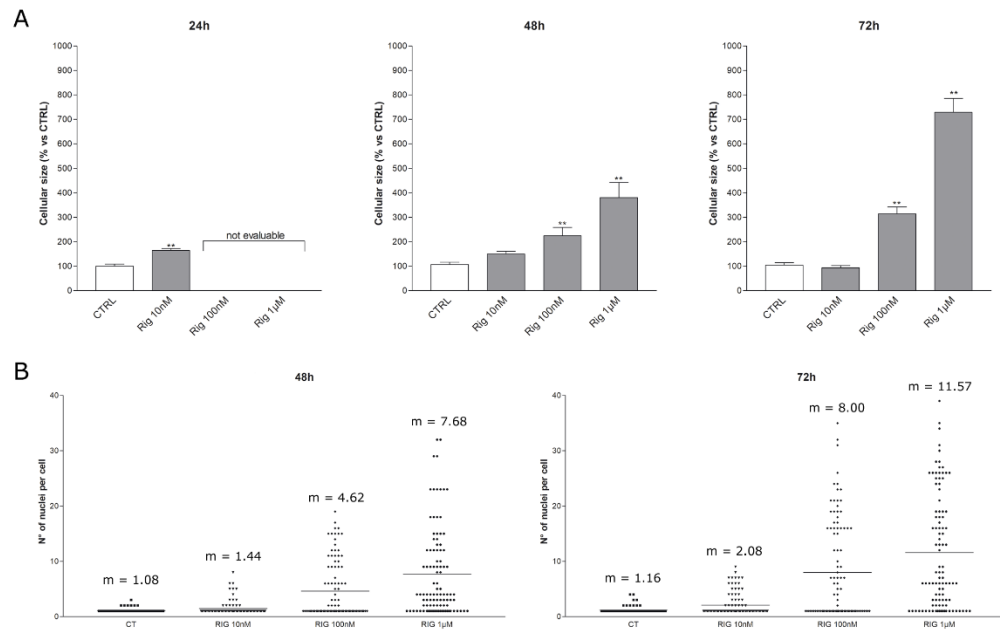

**Supplementary Figure S2. Cell size and nuclei number of TFK-1 cells treated with Rig.** (A) Graphs represent the mean  $\pm$  SD size of cells treated with increasing concentrations of Rig (1nM – 100μM) for 24, 48 and 72h. (B) Graphs represent the number of nuclei/micro-nuclei counted in each TFK-1 cell (at least 100 cells counted for each condition) treated with increasing concentration of Rig (10nM – 1μM). Horizontal black line and the number on the top represents the mean number of nuclei/micro-nuclei. ( $p < 0.01$  vs CTRL).

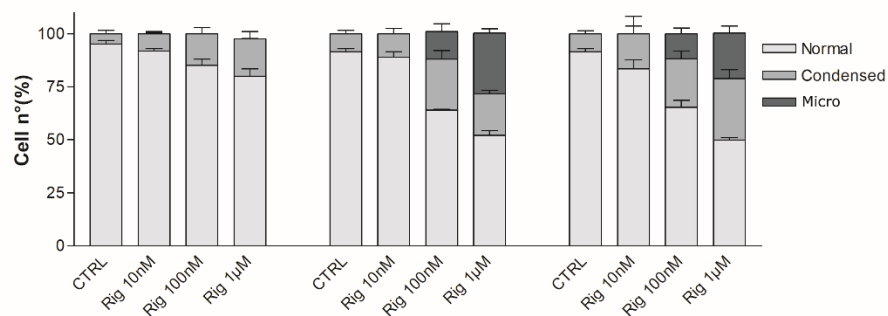

**Supplementary Figure S3. GIEMSA staining of TFK-1 cells treated with Rig.** Graph represent the mean  $\pm$  SD percentage of cells with normal nuclei (normal), condensed nuclei (condensed) or micro-nucleated (micro), after treatment with increasing concentrations of Rig (10nM – 1μM) for 24, 48 and 72h. Data are presented as the mean  $\pm$  SD of three independent experiments. (\*  $p < 0.05$ , \*\*  $p < 0.01$  vs CTRL).

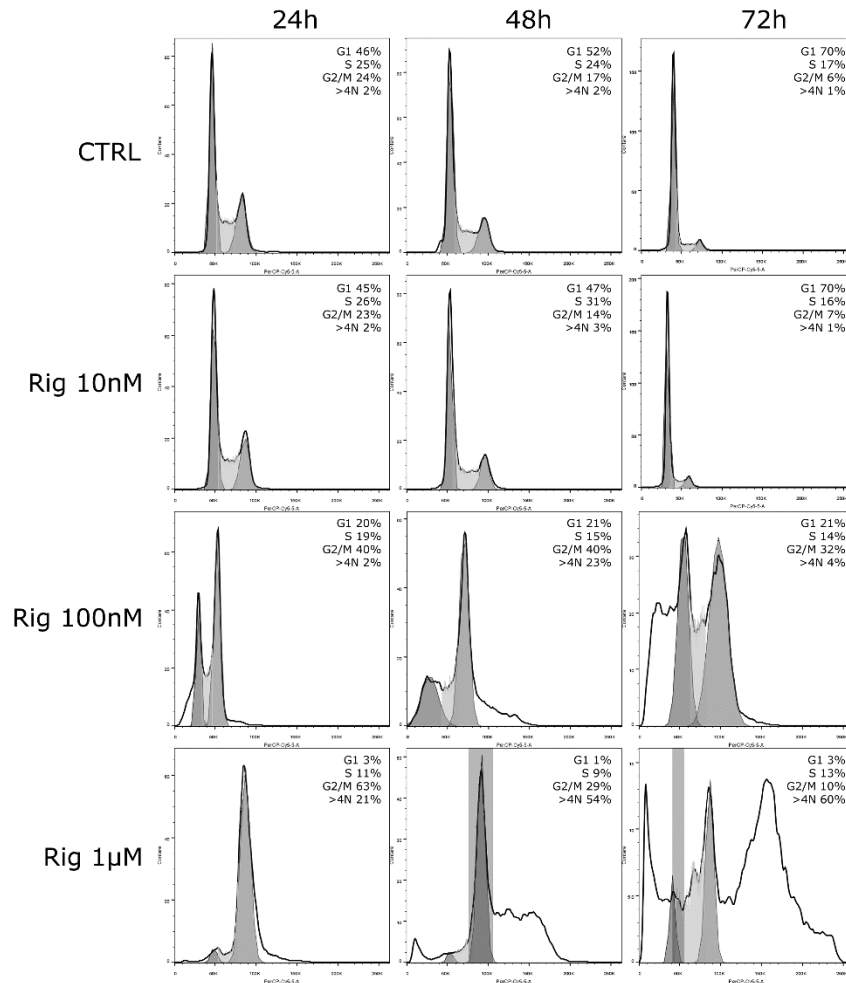

**Supplementary Figure S4. Cell cycle analysis of TFK-1 cells treated with Rig.** Representative histograms of the distribution of TFK-1 cells in the different phases of cell cycle after treatment with Rig 10nM, 100nM and 1µM, for 24, 48 and 72h.

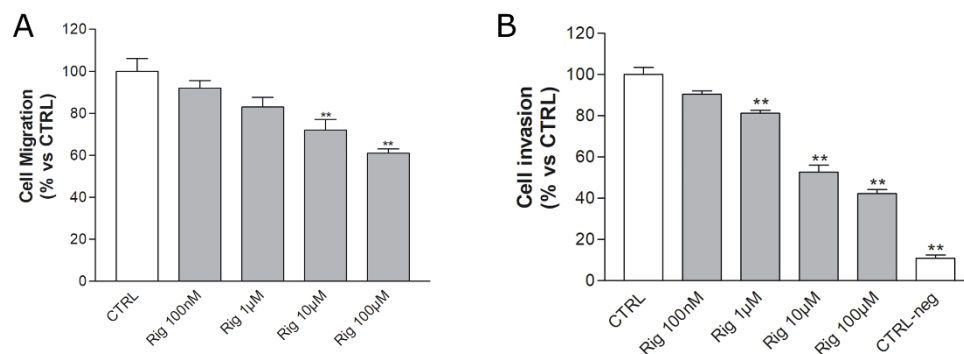

**Supplementary Figure S5. TFK-1 cell migration and invasion. (A)** Scratch wound healing assay of TFK-1 cells treated with increasing concentrations of Rig. The graph represent the mean  $\pm$  SD percentage of the area of cells that were able to close the scratch after treatment with increasing concentration of Rig compared to corresponding untreated control cells. **(B)** Boyden chamber assay of TFK-1 cells treated with increasing concentrations of Rig. Graph represent the percentage of cells that are able to pass through the membrane. CTRL and CTRL-neg represents cells without any treatment that passed through the membrane respectively in presence or in absence of serum in low chamber. Graphs are the mean  $\pm$  SD of three independent experiments. (\*  $p < 0.05$ , \*\*  $p < 0.01$  vs CTRL).

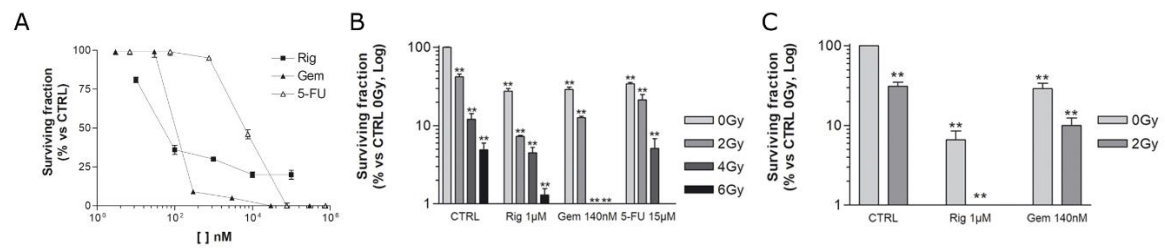

**Supplementary Figure S6. Clonogenic assay of TFK-1 cells and Rig.** (A) Clonogenic assay of TFK-1 cells treated with increasing concentrations of Rig (1nM-100μM), Gem (3nM-300μM) and 5-FU (7nM-700μM) without radiations. (B) Clonogenic assay of TFK-1 cells treated with Rig 1μM, Gem 140nM and 5-FU 15μM for 24h, and irradiated with increasing doses (0-6Gy). (D) Clonogenic assay of TFK-1 cells treated with Rig 1μM and Gem 140nM for 48h, and irradiated with increasing doses (0-6Gy). (\*\*  $p < 0.01$  vs CTRL).
